# Supplementary material
Source: MDPI journal article supplement (https://www.mdpi.com/2073-4344/12/4/361)
Supplement: s1 [file s1]

# The Effect of Calcination Temperature on Various Sources of $\text{ZrO}_2$ Supported Ni Catalyst for Dry Reforming of Methane

Ahmed Aidid Ibrahim <sup>1,\*</sup>, Anis Hamza Fakeeha <sup>1,\*\*</sup>, Mahmud Sofiu Lanre <sup>1</sup>, Abdulrhman S. Al-Awadi <sup>1</sup>, Salwa Bader Alreshaidan <sup>2</sup>, Yousef Abdulrahman Albaqmaa <sup>1</sup>, Syed Farooq Adil <sup>2</sup>, Ateyah A. Al-Zahrani <sup>1</sup>, Ahmed Elhag Abasaheed <sup>1</sup> and Ahmed S. Al-Fatesh <sup>1</sup>

<sup>1</sup> Chemical Engineering Department, College of Engineering, King Saud University, P.O. Box 800, Riyadh 11421, Saudi Arabia; alawadi@ksu.edu.sa (A.S.A.-A.); abasaheed@ksu.edu.sa (A.E.A.); mahmudsofiu@gmail.com (M.S.L.); aalfatesh@ksu.edu.sa (A.S.A.-F.); yousef201629@gmail.com (Y.A.A.-B.); aazz@ksu.edu.sa (A.A.Z.)

<sup>2</sup> Department of Chemistry, College of Science, King Saud University, P.O. Box 800, Riyadh 11451, Saudi Arabia; sfadil@ksu.edu.sa (S.F.A.); chem241@ksu.edu.sa (S.B.A.-R.)

\* Correspondence: aidid@ksu.edu.sa (A.A.I.); anishf@ksu.edu.sa (A.H.F.); Tel.: +966-467-6859 (A.A.I. & A.H.F.)

## Supplementary Information

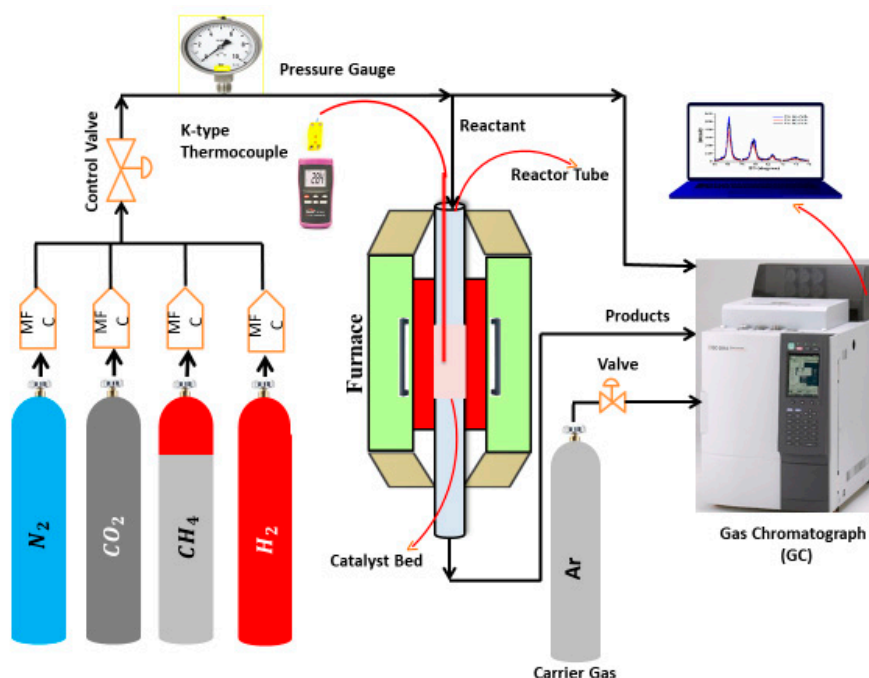

Figure S1. Experimental set-up.

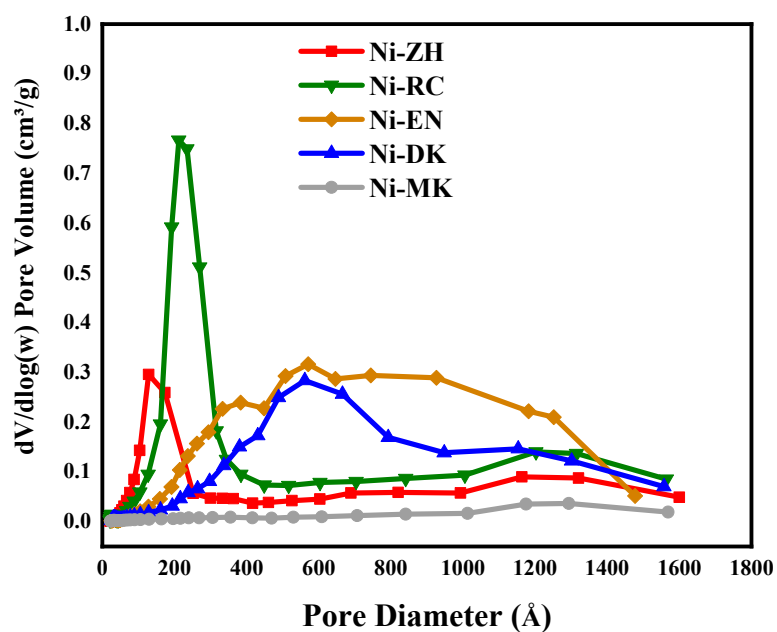

**Figure S2.** Pore size distribution for catalysts calcined at 600°C.

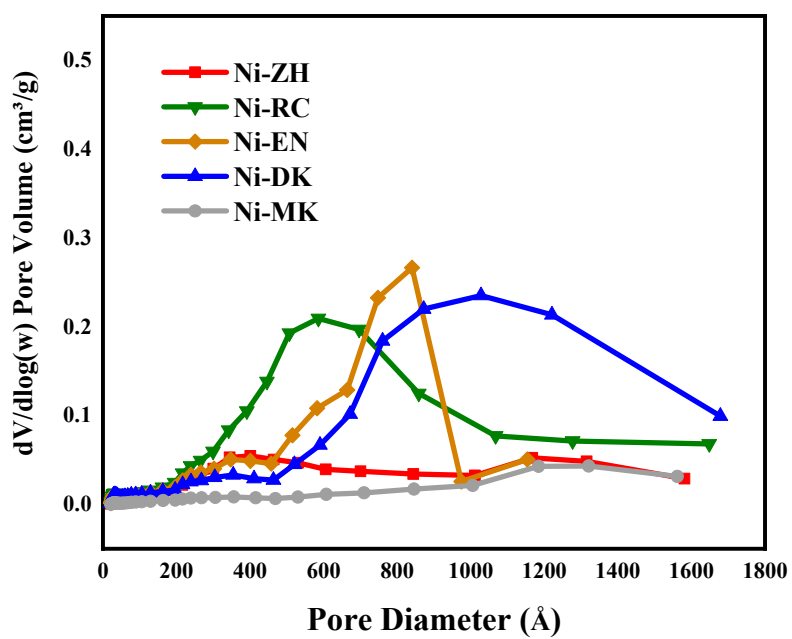

**Figure S3.** Pore size distribution for catalysts calcined at 700°C.

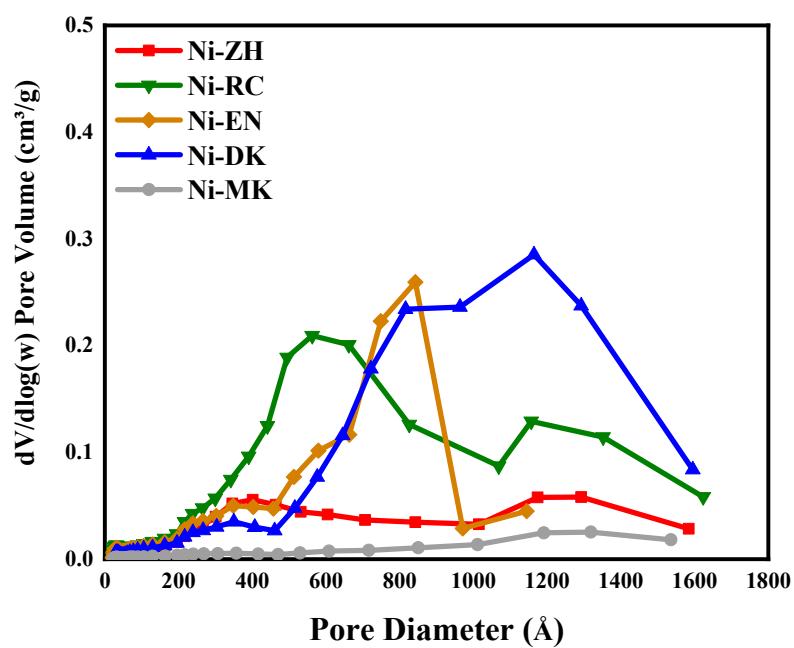

**Figure S4.** Pore size distribution for catalysts calcined at 800°C.

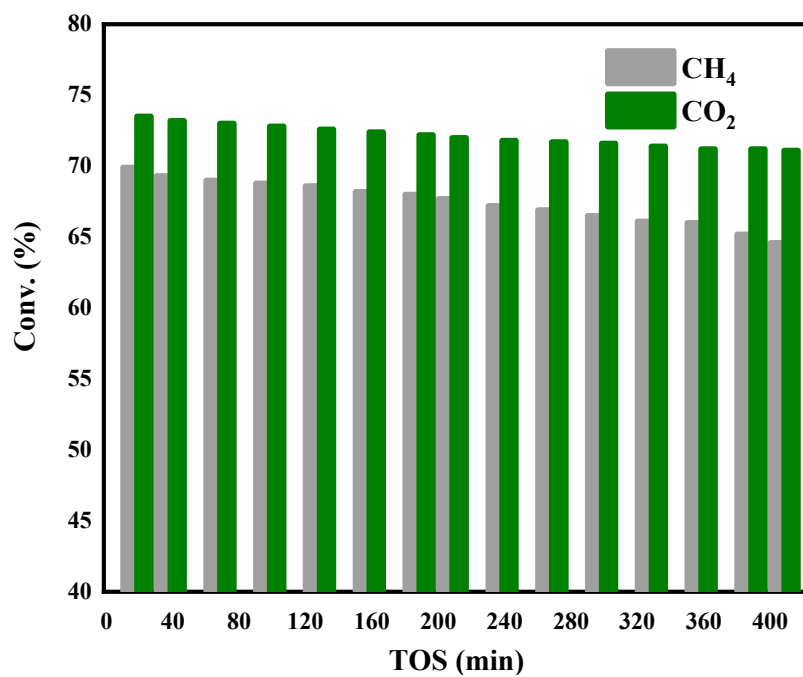

**Figure S5.** Stability study of the best catalyst (Ni-15Y-RC).
